# Supplementary material
Source: PubMed Central journal article supplement (PMC3731981)
Supplement: supp_JCO.2012.45.6228_Supplemental_Table6_JCO.2012.45.6228.pdf [file supp_JCO.2012.45.6228_Supplemental_Table6_JCO.2012.45.6228.pdf]

**Supplemental Table 6.** miR-155 associated gene expression signature for positively correlated genes  
Correlation of miR-155 expression in combined older and younger CN-AML patients.  
154 positively correlated (FDR<.001) genes, ordered by decreasing correlation coefficient.

| ProbeSet                     | Symbol                    | Name                                                                                  | Correlation coefficient | Parametric p-value |
|------------------------------|---------------------------|---------------------------------------------------------------------------------------|-------------------------|--------------------|
| <a href="#">229437_at</a>    | <a href="#">MIR155HG</a>  | MIR155 host gene (non-protein coding)                                                 | 0.819                   | < 1e-07            |
| <a href="#">228372_at</a>    | <a href="#">C10orf128</a> | chromosome 10 open reading frame 128                                                  | 0.513                   | < 1e-07            |
| <a href="#">211269_s_at</a>  | <a href="#">IL2RA</a>     | interleukin 2 receptor, alpha                                                         | 0.49                    | < 1e-07            |
| <a href="#">206341_at</a>    | <a href="#">IL2RA</a>     | interleukin 2 receptor, alpha                                                         | 0.489                   | < 1e-07            |
| <a href="#">209457_at</a>    | <a href="#">DUSP5</a>     | dual specificity phosphatase 5                                                        | 0.482                   | < 1e-07            |
| <a href="#">209695_at</a>    | <a href="#">PTP4A3</a>    | protein tyrosine phosphatase type IVA, member 3                                       | 0.457                   | < 1e-07            |
| <a href="#">1554999_at</a>   | <a href="#">RASGEF1B</a>  | RasGEF domain family, member 1B                                                       | 0.441                   | < 1e-07            |
| <a href="#">204224_s_at</a>  | <a href="#">GCH1</a>      | GTP cyclohydrolase 1                                                                  | 0.41                    | < 1e-07            |
| <a href="#">1554997_a_at</a> | <a href="#">PTGS2</a>     | prostaglandin-endoperoxide synthase 2 (prostaglandin G/H synthase and cyclooxygenase) | 0.4                     | < 1e-07            |
| <a href="#">241709_s_at</a>  | <a href="#">DOCK1</a>     | dedicator of cytokinesis 1                                                            | 0.398                   | < 1e-07            |
| <a href="#">212646_at</a>    | <a href="#">RFTN1</a>     | raftlin, lipid raft linker 1                                                          | 0.396                   | < 1e-07            |
| <a href="#">215078_at</a>    | <a href="#">SOD2</a>      | superoxide dismutase 2, mitochondrial                                                 | 0.395                   | < 1e-07            |
| <a href="#">206574_s_at</a>  | <a href="#">PTP4A3</a>    | protein tyrosine phosphatase type IVA, member 3                                       | 0.39                    | < 1e-07            |
| <a href="#">212385_at</a>    | <a href="#">TCF4</a>      | transcription factor 4                                                                | 0.39                    | < 1e-07            |
| <a href="#">204103_at</a>    | <a href="#">CCL4</a>      | chemokine (C-C motif) ligand 4                                                        | 0.387                   | < 1e-07            |
| <a href="#">215034_s_at</a>  | <a href="#">TM4SF1</a>    | transmembrane 4 L six family member 1                                                 | 0.386                   | < 1e-07            |
| <a href="#">239835_at</a>    | <a href="#">KBTBD8</a>    | kelch repeat and BTB (POZ) domain containing 8                                        | 0.382                   | < 1e-07            |
| <a href="#">204748_at</a>    | <a href="#">PTGS2</a>     | prostaglandin-endoperoxide synthase 2 (prostaglandin G/H synthase and cyclooxygenase) | 0.381                   | < 1e-07            |
| <a href="#">226530_at</a>    | <a href="#">BMF</a>       | Bcl2 modifying factor                                                                 | 0.377                   | < 1e-07            |
| <a href="#">203753_at</a>    | <a href="#">TCF4</a>      | transcription factor 4                                                                | 0.376                   | < 1e-07            |
| <a href="#">1563229_at</a>   | <a href="#">DLEU2</a>     | deleted in lymphocytic leukemia 2 (non-protein coding)                                | 0.371                   | < 1e-07            |
| <a href="#">202820_at</a>    | <a href="#">AHR</a>       | aryl hydrocarbon receptor                                                             | 0.368                   | < 1e-07            |
| <a href="#">228011_at</a>    | <a href="#">FAM92A1</a>   | family with sequence similarity 92, member A1                                         | 0.367                   | < 1e-07            |
| <a href="#">207655_s_at</a>  | <a href="#">BLNK</a>      | B-cell linker                                                                         | 0.365                   | < 1e-07            |
| <a href="#">228702_at</a>    | <a href="#">FLJ43663</a>  | hypothetical LOC378805                                                                | 0.364                   | < 1e-07            |
| <a href="#">230380_at</a>    | <a href="#">THAP2</a>     | THAP domain containing, apoptosis associated protein 2                                | 0.364                   | < 1e-07            |
| <a href="#">209386_at</a>    | <a href="#">TM4SF1</a>    | transmembrane 4 L six family member 1                                                 | 0.364                   | < 1e-07            |
| <a href="#">222146_s_at</a>  | <a href="#">TCF4</a>      | transcription factor 4                                                                | 0.362                   | < 1e-07            |
| <a href="#">202644_s_at</a>  | <a href="#">TNFAIP3</a>   | tumor necrosis factor, alpha-induced protein 3                                        | 0.36                    | < 1e-07            |
| <a href="#">201502_s_at</a>  | <a href="#">NFKBIA</a>    | nuclear factor of kappa light polypeptide gene enhancer in B-cells inhibitor, alpha   | 0.357                   | < 1e-07            |

|                              |                              |                                                                               |       |          |
|------------------------------|------------------------------|-------------------------------------------------------------------------------|-------|----------|
| <a href="#">226545_at</a>    | <a href="#">CD109</a>        | CD109 molecule                                                                | 0.356 | < 1e-07  |
| <a href="#">202643_s_at</a>  | <a href="#">TNFAIP3</a>      | tumor necrosis factor, alpha-induced protein 3                                | 0.356 | < 1e-07  |
| <a href="#">209392_at</a>    | <a href="#">ENPP2</a>        | ectonucleotide pyrophosphatase/phosphodiesterase 2                            | 0.354 | < 1e-07  |
| <a href="#">235391_at</a>    | <a href="#">FAM92A1</a>      | family with sequence similarity 92, member A1                                 | 0.353 | < 1e-07  |
| <a href="#">212386_at</a>    | <a href="#">TCF4</a>         | transcription factor 4                                                        | 0.352 | < 1e-07  |
| <a href="#">204440_at</a>    | <a href="#">CD83</a>         | CD83 molecule                                                                 | 0.35  | < 1e-07  |
| <a href="#">210839_s_at</a>  | <a href="#">ENPP2</a>        | ectonucleotide pyrophosphatase/phosphodiesterase 2                            | 0.35  | < 1e-07  |
| <a href="#">229900_at</a>    | <a href="#">CD109</a>        | CD109 molecule                                                                | 0.349 | < 1e-07  |
| <a href="#">202859_x_at</a>  | <a href="#">IL8</a>          | interleukin 8                                                                 | 0.349 | < 1e-07  |
| <a href="#">212387_at</a>    | <a href="#">TCF4</a>         | transcription factor 4                                                        | 0.347 | < 1e-07  |
| <a href="#">39402_at</a>     | <a href="#">IL1B</a>         | interleukin 1, beta                                                           | 0.346 | < 1e-07  |
| <a href="#">212382_at</a>    | <a href="#">TCF4</a>         | transcription factor 4                                                        | 0.346 | < 1e-07  |
| <a href="#">209365_s_at</a>  | <a href="#">ECM1</a>         | extracellular matrix protein 1                                                | 0.345 | < 1e-07  |
| <a href="#">236898_at</a>    | <a href="#">LOC100288781</a> | similar to hCG1994130                                                         | 0.345 | < 1e-07  |
| <a href="#">203897_at</a>    | <a href="#">LYRM1</a>        | LYR motif containing 1                                                        | 0.345 | < 1e-07  |
| <a href="#">1568695_s_at</a> | <a href="#">INTS6</a>        | integrator complex subunit 6                                                  | 0.344 | < 1e-07  |
| <a href="#">232504_at</a>    | <a href="#">LOC285628</a>    | hypothetical protein LOC285628                                                | 0.344 | < 1e-07  |
| <a href="#">200880_at</a>    | <a href="#">DNAJA1</a>       | DnaJ (Hsp40) homolog, subfamily A, member 1                                   | 0.342 | < 1e-07  |
| <a href="#">225615_at</a>    | <a href="#">IFFO2</a>        | intermediate filament family orphan 2                                         | 0.342 | < 1e-07  |
| <a href="#">230123_at</a>    | <a href="#">NECAP2</a>       | NECAP endocytosis associated 2                                                | 0.342 | < 1e-07  |
| <a href="#">205067_at</a>    | <a href="#">IL1B</a>         | interleukin 1, beta                                                           | 0.339 | < 1e-07  |
| <a href="#">236213_at</a>    | <a href="#">LOC100286920</a> | hypothetical protein LOC100286920                                             | 0.338 | < 1e-07  |
| <a href="#">212365_at</a>    | <a href="#">MYO1B</a>        | myosin IB                                                                     | 0.338 | < 1e-07  |
| <a href="#">220669_at</a>    | <a href="#">OTUD4</a>        | OTU domain containing 4                                                       | 0.337 | 1.00E-07 |
| <a href="#">229054_at</a>    | <a href="#">C14orf181</a>    | chromosome 14 open reading frame 181                                          | 0.336 | 1.00E-07 |
| <a href="#">201631_s_at</a>  | <a href="#">IER3</a>         | immediate early response 3                                                    | 0.336 | 1.00E-07 |
| <a href="#">203373_at</a>    | <a href="#">SOCS2</a>        | suppressor of cytokine signaling 2                                            | 0.336 | 1.00E-07 |
| <a href="#">216016_at</a>    | <a href="#">NLRP3</a>        | NLR family, pyrin domain containing 3                                         | 0.335 | 1.00E-07 |
| <a href="#">229744_at</a>    | <a href="#">SSFA2</a>        | sperm specific antigen 2                                                      | 0.335 | 1.00E-07 |
| <a href="#">201719_s_at</a>  | <a href="#">EPB41L2</a>      | erythrocyte membrane protein band 4.1 like 2                                  | 0.334 | 1.00E-07 |
| <a href="#">225979_at</a>    | <a href="#">PLEKHG2</a>      | pleckstrin homology domain containing, family G (with RhoGef domain) member 2 | 0.334 | 1.00E-07 |
| <a href="#">232188_at</a>    | <a href="#">AKAP13</a>       | A kinase (PRKA) anchor protein 13                                             | 0.333 | 1.00E-07 |
| <a href="#">209218_at</a>    | <a href="#">SQLE</a>         | squalene epoxidase                                                            | 0.332 | 1.00E-07 |
| <a href="#">213891_s_at</a>  | <a href="#">TCF4</a>         | transcription factor 4                                                        | 0.331 | 1.00E-07 |
| <a href="#">211506_s_at</a>  | <a href="#">IL8</a>          | interleukin 8                                                                 | 0.33  | 1.00E-07 |
| <a href="#">203372_s_at</a>  | <a href="#">SOCS2</a>        | suppressor of cytokine signaling 2                                            | 0.33  | 1.00E-07 |
| <a href="#">210656_at</a>    | <a href="#">EED</a>          | embryonic ectoderm development                                                | 0.328 | 1.00E-07 |
| <a href="#">207075_at</a>    | <a href="#">NLRP3</a>        | NLR family, pyrin domain containing 3                                         | 0.326 | 2.00E-07 |
| <a href="#">1559315_s_at</a> | <a href="#">LOC144481</a>    | hypothetical protein LOC144481                                                | 0.325 | 2.00E-07 |
| <a href="#">207426_s_at</a>  | <a href="#">TNFSF4</a>       | tumor necrosis factor (ligand) superfamily, member 4                          | 0.325 | 2.00E-07 |
| <a href="#">218810_at</a>    | <a href="#">ZC3H12A</a>      | zinc finger CCCH-type containing 12A                                          | 0.324 | 2.00E-07 |

|                              |                          |                                                                   |       |          |
|------------------------------|--------------------------|-------------------------------------------------------------------|-------|----------|
| <a href="#">226071_at</a>    | <a href="#">ADAMTSL4</a> | ADAMTS-like 4                                                     | 0.322 | 2.00E-07 |
| <a href="#">214390_s_at</a>  | <a href="#">BCAT1</a>    | branched chain amino-acid transaminase 1, cytosolic               | 0.322 | 2.00E-07 |
| <a href="#">216015_s_at</a>  | <a href="#">NLRP3</a>    | NLR family, pyrin domain containing 3                             | 0.322 | 2.00E-07 |
| <a href="#">213324_at</a>    | <a href="#">SRC</a>      | v-src sarcoma (Schmidt-Ruppin A-2) viral oncogene homolog (avian) | 0.322 | 2.00E-07 |
| <a href="#">209326_at</a>    | <a href="#">SLC35A2</a>  | solute carrier family 35 (UDP-galactose transporter), member A2   | 0.321 | 3.00E-07 |
| <a href="#">213562_s_at</a>  | <a href="#">SQLE</a>     | squalene epoxidase                                                | 0.321 | 3.00E-07 |
| <a href="#">201718_s_at</a>  | <a href="#">EPB41L2</a>  | erythrocyte membrane protein band 4.1-like 2                      | 0.32  | 3.00E-07 |
| <a href="#">210299_s_at</a>  | <a href="#">FHL1</a>     | four and a half LIM domains 1                                     | 0.318 | 3.00E-07 |
| <a href="#">219480_at</a>    | <a href="#">SNAI1</a>    | snail homolog 1 (Drosophila)                                      | 0.318 | 3.00E-07 |
| <a href="#">201540_at</a>    | <a href="#">FHL1</a>     | four and a half LIM domains 1                                     | 0.317 | 4.00E-07 |
| <a href="#">1554486_a_at</a> | <a href="#">C6orf114</a> | chromosome 6 open reading frame 114                               | 0.316 | 4.00E-07 |
| <a href="#">209530_at</a>    | <a href="#">CACNB3</a>   | calcium channel, voltage-dependent, beta 3 subunit                | 0.314 | 5.00E-07 |
| <a href="#">239719_at</a>    | <a href="#">CD109</a>    | CD109 molecule                                                    | 0.314 | 5.00E-07 |
| <a href="#">235252_at</a>    | <a href="#">KSR1</a>     | kinase suppressor of ras 1                                        | 0.313 | 5.00E-07 |
| <a href="#">225699_at</a>    | <a href="#">C7orf40</a>  | chromosome 7 open reading frame 40                                | 0.309 | 7.00E-07 |
| <a href="#">204363_at</a>    | <a href="#">F3</a>       | coagulation factor III (thromboplastin, tissue factor)            | 0.309 | 7.00E-07 |
| <a href="#">203187_at</a>    | <a href="#">DOCK1</a>    | dedicator of cytokinesis 1                                        | 0.308 | 8.00E-07 |
| <a href="#">207375_s_at</a>  | <a href="#">IL15RA</a>   | interleukin 15 receptor, alpha                                    | 0.308 | 8.00E-07 |
| <a href="#">226390_at</a>    | <a href="#">STARD4</a>   | StAR-related lipid transfer (START) domain containing 4           | 0.308 | 8.00E-07 |
| <a href="#">224496_s_at</a>  | <a href="#">TMEM107</a>  | transmembrane protein 107                                         | 0.308 | 8.00E-07 |
| <a href="#">204794_at</a>    | <a href="#">DUSP2</a>    | dual specificity phosphatase 2                                    | 0.307 | 9.00E-07 |
| <a href="#">201329_s_at</a>  | <a href="#">ETS2</a>     | v-ets erythroblastosis virus E26 oncogene homolog 2 (avian)       | 0.307 | 8.00E-07 |
| <a href="#">202638_s_at</a>  | <a href="#">ICAM1</a>    | intercellular adhesion molecule 1                                 | 0.307 | 9.00E-07 |
| <a href="#">226459_at</a>    | <a href="#">PIK3AP1</a>  | phosphoinositide-3-kinase adaptor protein 1                       | 0.307 | 8.00E-07 |
| <a href="#">206148_at</a>    | <a href="#">IL3RA</a>    | interleukin 3 receptor, alpha (low affinity)                      | 0.306 | 1.00E-06 |
| <a href="#">225344_at</a>    | <a href="#">NCOA7</a>    | nuclear receptor coactivator 7                                    | 0.306 | 1.00E-06 |
| <a href="#">214581_x_at</a>  | <a href="#">TNFRSF21</a> | tumor necrosis factor receptor superfamily, member 21             | 0.306 | 9.00E-07 |
| <a href="#">204073_s_at</a>  | <a href="#">C11orf9</a>  | chromosome 11 open reading frame 9                                | 0.305 | 1.00E-06 |
| <a href="#">224606_at</a>    | <a href="#">KLF6</a>     | Kruppel-like factor 6                                             | 0.304 | 1.10E-06 |
| <a href="#">205193_at</a>    | <a href="#">MAFF</a>     | v-maf musculoaponeurotic fibrosarcoma oncogene homolog F (avian)  | 0.303 | 1.20E-06 |
| <a href="#">200787_s_at</a>  | <a href="#">PEA15</a>    | phosphoprotein enriched in astrocytes 15                          | 0.303 | 1.20E-06 |
| <a href="#">205298_s_at</a>  | <a href="#">BTN2A2</a>   | butyrophilin, subfamily 2, member A2                              | 0.302 | 1.30E-06 |
| <a href="#">218898_at</a>    | <a href="#">FAM57A</a>   | family with sequence similarity 57, member A                      | 0.302 | 1.30E-06 |
| <a href="#">214505_s_at</a>  | <a href="#">FHL1</a>     | four and a half LIM domains 1                                     | 0.302 | 1.30E-06 |
| <a href="#">223159_s_at</a>  | <a href="#">NEK6</a>     | NIMA (never in mitosis gene a)-related kinase 6                   | 0.302 | 1.30E-06 |

|                             |                           |                                                                              |       |          |
|-----------------------------|---------------------------|------------------------------------------------------------------------------|-------|----------|
| <a href="#">242814_at</a>   | <a href="#">SERPINB9</a>  | serpin peptidase inhibitor, clade B (ovalbumin), member 9                    | 0.302 | 1.30E-06 |
| <a href="#">221881_s_at</a> | <a href="#">CLIC4</a>     | chloride intracellular channel 4                                             | 0.301 | 1.40E-06 |
| <a href="#">213038_at</a>   | <a href="#">RNF19B</a>    | ring finger protein 19B                                                      | 0.3   | 1.60E-06 |
| <a href="#">218856_at</a>   | <a href="#">TNFRSF21</a>  | tumor necrosis factor receptor superfamily, member 21                        | 0.3   | 1.60E-06 |
| <a href="#">213075_at</a>   | <a href="#">OLFML2A</a>   | olfactomedin-like 2A                                                         | 0.298 | 1.90E-06 |
| <a href="#">36564_at</a>    | <a href="#">RNF19B</a>    | ring finger protein 19B                                                      | 0.298 | 1.80E-06 |
| <a href="#">218429_s_at</a> | <a href="#">C19orf66</a>  | chromosome 19 open reading frame 66                                          | 0.297 | 2.00E-06 |
| <a href="#">215925_s_at</a> | <a href="#">CD72</a>      | CD72 molecule                                                                | 0.297 | 2.00E-06 |
| <a href="#">232052_at</a>   | <a href="#">LOC440944</a> | hypothetical LOC440944                                                       | 0.297 | 2.00E-06 |
| <a href="#">36711_at</a>    | <a href="#">MAFF</a>      | v-maf musculoaponeurotic fibrosarcoma oncogene homolog F (avian)             | 0.296 | 2.10E-06 |
| <a href="#">209544_at</a>   | <a href="#">RIPK2</a>     | receptor-interacting serine-threonine kinase 2                               | 0.296 | 2.10E-06 |
| <a href="#">216841_s_at</a> | <a href="#">SOD2</a>      | superoxide dismutase 2, mitochondrial                                        | 0.296 | 2.10E-06 |
| <a href="#">1554508_at</a>  | <a href="#">PIK3AP1</a>   | phosphoinositide-3-kinase adaptor protein 1                                  | 0.295 | 2.40E-06 |
| <a href="#">201939_at</a>   | <a href="#">PLK2</a>      | polo-like kinase 2                                                           | 0.295 | 2.30E-06 |
| <a href="#">1569203_at</a>  | <a href="#">CXCL2</a>     | chemokine (C-X-C motif) ligand 2                                             | 0.294 | 2.40E-06 |
| <a href="#">210117_at</a>   | <a href="#">SPAG1</a>     | sperm associated antigen 1                                                   | 0.294 | 2.50E-06 |
| <a href="#">207113_s_at</a> | <a href="#">TNF</a>       | tumor necrosis factor                                                        | 0.294 | 2.50E-06 |
| <a href="#">204057_at</a>   | <a href="#">IRF8</a>      | interferon regulatory factor 8                                               | 0.293 | 2.70E-06 |
| <a href="#">1569020_at</a>  | <a href="#">NEDD9</a>     | neural precursor cell expressed, developmentally down-regulated 9            | 0.293 | 2.80E-06 |
| <a href="#">202637_s_at</a> | <a href="#">ICAM1</a>     | intercellular adhesion molecule 1                                            | 0.292 | 2.90E-06 |
| <a href="#">223158_s_at</a> | <a href="#">NEK6</a>      | NIMA (never in mitosis gene a)-related kinase 6                              | 0.292 | 2.90E-06 |
| <a href="#">219499_at</a>   | <a href="#">SEC61A2</a>   | Sec61 alpha 2 subunit ( <i>S. cerevisiae</i> )                               | 0.291 | 3.10E-06 |
| <a href="#">1566363_at</a>  | <a href="#">DNMT</a>      | deoxynucleotidyltransferase, terminal                                        | 0.29  | 3.30E-06 |
| <a href="#">231887_s_at</a> | <a href="#">KIAA1274</a>  | KIAA1274                                                                     | 0.29  | 3.50E-06 |
| <a href="#">228607_at</a>   | <a href="#">OAS2</a>      | 2'-5'-oligoadenylate synthetase 2, 69/71kDa                                  | 0.29  | 3.40E-06 |
| <a href="#">204430_s_at</a> | <a href="#">SLC2A5</a>    | solute carrier family 2 (facilitated glucose/fructose transporter), member 5 | 0.29  | 3.50E-06 |
| <a href="#">218789_s_at</a> | <a href="#">C11orf71</a>  | chromosome 11 open reading frame 71                                          | 0.289 | 3.80E-06 |
| <a href="#">203716_s_at</a> | <a href="#">DPP4</a>      | dipeptidyl-peptidase 4                                                       | 0.289 | 3.80E-06 |
| <a href="#">230363_s_at</a> | <a href="#">INPP5F</a>    | inositol polyphosphate-5-phosphatase F                                       | 0.289 | 3.70E-06 |
| <a href="#">205599_at</a>   | <a href="#">TRAF1</a>     | TNF receptor-associated factor 1                                             | 0.289 | 3.60E-06 |
| <a href="#">220507_s_at</a> | <a href="#">UPB1</a>      | ureidopropionase, beta                                                       | 0.289 | 3.80E-06 |
| <a href="#">213895_at</a>   | <a href="#">EMP1</a>      | epithelial membrane protein 1                                                | 0.288 | 4.10E-06 |
| <a href="#">205582_s_at</a> | <a href="#">GGT5</a>      | gamma-glutamyltransferase 5                                                  | 0.288 | 4.00E-06 |
| <a href="#">221477_s_at</a> | <a href="#">SOD2</a>      | superoxide dismutase 2, mitochondrial                                        | 0.288 | 3.90E-06 |
| <a href="#">210815_s_at</a> | <a href="#">CALCRL</a>    | calcitonin receptor-like                                                     | 0.287 | 4.50E-06 |
| <a href="#">201328_at</a>   | <a href="#">ETS2</a>      | v-ets erythroblastosis virus E26 oncogene homolog 2 (avian)                  | 0.287 | 4.30E-06 |

|                              |                              |                                                           |       |          |
|------------------------------|------------------------------|-----------------------------------------------------------|-------|----------|
| <a href="#">228468_at</a>    | <a href="#">MASTL</a>        | microtubule associated serine/threonine kinase-like       | 0.287 | 4.40E-06 |
| <a href="#">204269_at</a>    | <a href="#">PIM2</a>         | pim-2 oncogene                                            | 0.287 | 4.50E-06 |
| <a href="#">1557352_at</a>   | <a href="#">SQLE</a>         | squalene epoxidase                                        | 0.287 | 4.40E-06 |
| <a href="#">208296_x_at</a>  | <a href="#">TNFAIP8</a>      | tumor necrosis factor, alpha-induced protein 8            | 0.287 | 4.40E-06 |
| <a href="#">221718_s_at</a>  | <a href="#">AKAP13</a>       | A kinase (PRKA) anchor protein 13                         | 0.286 | 4.60E-06 |
| <a href="#">224884_at</a>    | <a href="#">AKAP13</a>       | A kinase (PRKA) anchor protein 13                         | 0.286 | 4.90E-06 |
| <a href="#">220658_s_at</a>  | <a href="#">ARNTL2</a>       | aryl hydrocarbon receptor nuclear translocator-like 2     | 0.285 | 5.10E-06 |
| <a href="#">209732_at</a>    | <a href="#">CLEC2B</a>       | C-type lectin domain family 2, member B                   | 0.285 | 5.10E-06 |
| <a href="#">204533_at</a>    | <a href="#">CXCL10</a>       | chemokine (C-X-C motif) ligand 10                         | 0.285 | 5.10E-06 |
| <a href="#">218823_s_at</a>  | <a href="#">KCTD9</a>        | potassium channel tetramerisation domain containing 9     | 0.285 | 5.00E-06 |
| <a href="#">201647_s_at</a>  | <a href="#">SCARB2</a>       | scavenger receptor class B, member 2                      | 0.285 | 5.20E-06 |
| <a href="#">226517_at</a>    | <a href="#">BCAT1</a>        | branched chain amino-acid transaminase 1, cytosolic       | 0.284 | 5.60E-06 |
| <a href="#">210233_at</a>    | <a href="#">IL1RAP</a>       | interleukin 1 receptor accessory protein                  | 0.284 | 5.80E-06 |
| <a href="#">204059_s_at</a>  | <a href="#">ME1</a>          | malic enzyme 1, NADP(+)-dependent, cytosolic              | 0.284 | 5.70E-06 |
| <a href="#">1552301_a_at</a> | <a href="#">CORO6</a>        | coronin 6                                                 | 0.283 | 6.20E-06 |
| <a href="#">224983_at</a>    | <a href="#">SCARB2</a>       | scavenger receptor class B, member 2                      | 0.283 | 6.20E-06 |
| <a href="#">210260_s_at</a>  | <a href="#">TNFAIP8</a>      | tumor necrosis factor, alpha-induced protein 8            | 0.283 | 5.90E-06 |
| <a href="#">217826_s_at</a>  | <a href="#">UBE2J1</a>       | ubiquitin-conjugating enzyme E2, J1 (UBC6 homolog, yeast) | 0.283 | 6.10E-06 |
| <a href="#">200788_s_at</a>  | <a href="#">PEA15</a>        | phosphoprotein enriched in astrocytes 15                  | 0.282 | 6.70E-06 |
| <a href="#">1555486_a_at</a> | <a href="#">PRR5L</a>        | proline rich 5 like                                       | 0.282 | 6.30E-06 |
| <a href="#">207076_s_at</a>  | <a href="#">ASS1</a>         | argininosuccinate synthase 1                              | 0.281 | 7.30E-06 |
| <a href="#">206082_at</a>    | <a href="#">HCP5</a>         | HLA complex P5                                            | 0.281 | 7.10E-06 |
| <a href="#">53720_at</a>     | <a href="#">C19orf66</a>     | chromosome 19 open reading frame 66                       | 0.279 | 8.20E-06 |
| <a href="#">202910_s_at</a>  | <a href="#">CD97</a>         | CD97 molecule                                             | 0.279 | 7.90E-06 |
| <a href="#">209774_x_at</a>  | <a href="#">CXCL2</a>        | chemokine (C-X-C motif) ligand 2                          | 0.279 | 8.20E-06 |
| <a href="#">201325_s_at</a>  | <a href="#">EMP1</a>         | epithelial membrane protein 1                             | 0.279 | 8.40E-06 |
| <a href="#">230067_at</a>    | <a href="#">FAM124A</a>      | family with sequence similarity 124A                      | 0.279 | 8.10E-06 |
| <a href="#">210298_x_at</a>  | <a href="#">FHL1</a>         | four and a half LIM domains 1                             | 0.279 | 8.40E-06 |
| <a href="#">244080_at</a>    | <a href="#">LOC100287039</a> | hypothetical protein LOC100287039                         | 0.279 | 8.10E-06 |
| <a href="#">218086_at</a>    | <a href="#">NPDC1</a>        | neural proliferation, differentiation and control, 1      | 0.279 | 8.00E-06 |
| <a href="#">210519_s_at</a>  | <a href="#">NQO1</a>         | NAD(P)H dehydrogenase, quinone 1                          | 0.279 | 8.00E-06 |
| <a href="#">224204_x_at</a>  | <a href="#">ARNTL2</a>       | aryl hydrocarbon receptor nuclear translocator-like 2     | 0.278 | 9.20E-06 |
| <a href="#">227808_at</a>    | <a href="#">DNAJC15</a>      | DnaJ (Hsp40) homolog, subfamily C, member 15              | 0.278 | 9.10E-06 |
| <a href="#">201539_s_at</a>  | <a href="#">FHL1</a>         | four and a half LIM domains 1                             | 0.278 | 8.70E-06 |
| <a href="#">1552329_at</a>   | <a href="#">RBBP6</a>        | retinoblastoma binding protein 6                          | 0.278 | 8.60E-06 |
| <a href="#">237016_at</a>    | <a href="#">TMEM217</a>      | transmembrane protein 217                                 | 0.278 | 8.50E-06 |
| <a href="#">48531_at</a>     | <a href="#">TNIP2</a>        | TNFAIP3 interacting protein 2                             | 0.278 | 9.20E-06 |

|                              |                              |                                                                                    |       |          |
|------------------------------|------------------------------|------------------------------------------------------------------------------------|-------|----------|
| <a href="#">1553736_at</a>   | <a href="#">ZFC3H1</a>       | zinc finger, C3H1-type containing                                                  | 0.278 | 8.70E-06 |
| <a href="#">224739_at</a>    | <a href="#">PIM3</a>         | pim-3 oncogene                                                                     | 0.277 | 9.80E-06 |
| <a href="#">213134_x_at</a>  | <a href="#">BTG3</a>         | BTG family, member 3                                                               | 0.276 | 1.03E-05 |
| <a href="#">233986_s_at</a>  | <a href="#">PLEKHG2</a>      | pleckstrin homology domain containing, family G (with RhoGef domain) member 2      | 0.276 | 9.90E-06 |
| <a href="#">210365_at</a>    | <a href="#">RUNX1</a>        | runt-related transcription factor 1                                                | 0.276 | 1.02E-05 |
| <a href="#">228747_at</a>    | <a href="#">SEC61A2</a>      | Sec61 alpha 2 subunit ( <i>S. cerevisiae</i> )                                     | 0.276 | 9.90E-06 |
| <a href="#">1555832_s_at</a> | <a href="#">KLF6</a>         | Kruppel-like factor 6                                                              | 0.275 | 1.13E-05 |
| <a href="#">1559777_at</a>   | <a href="#">LOC731424</a>    | hypothetical LOC731424                                                             | 0.275 | 1.14E-05 |
| <a href="#">200797_s_at</a>  | <a href="#">MCL1</a>         | myeloid cell leukemia sequence 1 (BCL2-related)                                    | 0.275 | 1.09E-05 |
| <a href="#">213577_at</a>    | <a href="#">SQLE</a>         | squalene epoxidase                                                                 | 0.275 | 1.14E-05 |
| <a href="#">1552755_at</a>   | <a href="#">C9orf66</a>      | chromosome 9 open reading frame 66                                                 | 0.274 | 1.17E-05 |
| <a href="#">206429_at</a>    | <a href="#">F2RL1</a>        | coagulation factor II (thrombin) receptor like 1                                   | 0.274 | 1.15E-05 |
| <a href="#">211139_s_at</a>  | <a href="#">NAB1</a>         | NGFI-A binding protein 1 (EGR1 binding protein 1)                                  | 0.274 | 1.23E-05 |
| <a href="#">224579_at</a>    | <a href="#">SLC38A1</a>      | solute carrier family 38, member 1                                                 | 0.274 | 1.20E-05 |
| <a href="#">222243_s_at</a>  | <a href="#">TOB2</a>         | transducer of ERBB2, 2                                                             | 0.274 | 1.21E-05 |
| <a href="#">206331_at</a>    | <a href="#">CALCRL</a>       | calcitonin receptor-like                                                           | 0.273 | 1.26E-05 |
| <a href="#">235688_s_at</a>  | <a href="#">TRAF4</a>        | TNF receptor-associated factor 4                                                   | 0.273 | 1.25E-05 |
| <a href="#">220246_at</a>    | <a href="#">CAMK1D</a>       | calcium/calmodulin-dependent protein kinase ID                                     | 0.272 | 1.39E-05 |
| <a href="#">244074_at</a>    | <a href="#">LOC100129104</a> | hypothetical LOC100129104                                                          | 0.272 | 1.38E-05 |
| <a href="#">225949_at</a>    | <a href="#">NRBP2</a>        | nuclear receptor binding protein 2                                                 | 0.272 | 1.43E-05 |
| <a href="#">227420_at</a>    | <a href="#">TNFAIP8L1</a>    | tumor necrosis factor, alpha-induced protein 8-like 1                              | 0.272 | 1.35E-05 |
| <a href="#">217853_at</a>    | <a href="#">TNS3</a>         | tensin 3                                                                           | 0.272 | 1.35E-05 |
| <a href="#">206756_at</a>    | <a href="#">CHST7</a>        | carbohydrate (N-acetylglucosamine 6-O) sulfotransferase 7                          | 0.271 | 1.47E-05 |
| <a href="#">225970_at</a>    | <a href="#">DDHD1</a>        | DDHD domain containing 1                                                           | 0.271 | 1.55E-05 |
| <a href="#">212070_at</a>    | <a href="#">GPR56</a>        | G protein-coupled receptor 56                                                      | 0.27  | 1.56E-05 |
| <a href="#">202150_s_at</a>  | <a href="#">NEDD9</a>        | neural precursor cell expressed, developmentally down-regulated 9                  | 0.27  | 1.57E-05 |
| <a href="#">223218_s_at</a>  | <a href="#">NFKBIZ</a>       | nuclear factor of kappa light polypeptide gene enhancer in B-cells inhibitor, zeta | 0.27  | 1.58E-05 |
| <a href="#">204484_at</a>    | <a href="#">PIK3C2B</a>      | phosphoinositide-3-kinase, class 2, beta polypeptide                               | 0.27  | 1.61E-05 |

| <b>FDR</b> | <b>Permutation p-value</b> |
|------------|----------------------------|
| < 1e-07    | < 1e-07                    |





|          |          |
|----------|----------|
| 3.97E-05 | < 1e-07  |
| 5.62E-05 | < 1e-07  |
| 7.22E-05 | < 1e-07  |
| 7.22E-05 | < 1e-07  |
| 8.41E-05 | < 1e-07  |
| 8.41E-05 | < 1e-07  |
| 8.41E-05 | < 1e-07  |
| 0.000113 | < 1e-07  |
| 0.000113 | < 1e-07  |
| 0.000123 | < 1e-07  |
| 0.000123 | < 1e-07  |
| 0.000123 | 1.00E-04 |
| 0.000123 | < 1e-07  |
| 0.000135 | < 1e-07  |
| 0.000123 | < 1e-07  |
| 0.000135 | 1.00E-04 |
| 0.000123 | < 1e-07  |
| 0.000147 | < 1e-07  |
| 0.000147 | < 1e-07  |
| 0.000135 | < 1e-07  |
| 0.000147 | < 1e-07  |
| 0.000155 | < 1e-07  |
| 0.000164 | < 1e-07  |
| 0.000164 | < 1e-07  |
| 0.00017  | < 1e-07  |

|          |          |
|----------|----------|
| 0.00017  | < 1e-07  |
| 0.00018  | < 1e-07  |
| 2.00E-04 | < 1e-07  |
| 2.00E-04 | < 1e-07  |
| 0.000229 | < 1e-07  |
| 0.000223 | < 1e-07  |
| 0.000236 | < 1e-07  |
| 0.000236 | < 1e-07  |
| 0.000236 | < 1e-07  |
| 0.000242 | < 1e-07  |
| 0.000242 | < 1e-07  |
| 0.000242 | < 1e-07  |
| 0.00027  | < 1e-07  |
| 0.000262 | < 1e-07  |
| 0.00027  | < 1e-07  |
| 0.000278 | < 1e-07  |
| 0.000278 | < 1e-07  |
| 0.000297 | < 1e-07  |
| 0.000303 | < 1e-07  |
| 0.000308 | 1.00E-04 |
| 0.000308 | < 1e-07  |
| 0.000326 | < 1e-07  |
| 0.000345 | < 1e-07  |
| 0.000353 | < 1e-07  |
| 0.000352 | < 1e-07  |
| 0.000353 | < 1e-07  |
| 0.00037  | < 1e-07  |
| 0.00037  | < 1e-07  |
| 0.000366 | < 1e-07  |
| 0.000359 | < 1e-07  |
| 0.00037  | < 1e-07  |
| 0.00039  | < 1e-07  |
| 0.000382 | < 1e-07  |
| 0.000378 | < 1e-07  |
| 0.00041  | < 1e-07  |
| 0.000405 | < 1e-07  |

|          |          |
|----------|----------|
| 0.000406 | < 1e-07  |
| 0.00041  | < 1e-07  |
| 0.000406 | < 1e-07  |
| 0.000406 | < 1e-07  |
| 0.000415 | < 1e-07  |
| 0.000438 | < 1e-07  |
| 0.000448 | < 1e-07  |
| 0.000448 | < 1e-07  |
| 0.000448 | < 1e-07  |
| 0.000445 | < 1e-07  |
| 0.000455 | < 1e-07  |
| 0.000485 | < 1e-07  |
| 0.000496 | < 1e-07  |
| 0.000492 | < 1e-07  |
| 0.000515 | < 1e-07  |
| 0.000515 | < 1e-07  |
| 0.000498 | < 1e-07  |
| 0.000511 | < 1e-07  |
| 0.000549 | < 1e-07  |
| 0.000521 | < 1e-07  |
| 0.000589 | < 1e-07  |
| 0.000575 | < 1e-07  |
| 0.000625 | < 1e-07  |
| 0.000617 | < 1e-07  |
| 0.000625 | < 1e-07  |
| 0.000631 | < 1e-07  |
| 0.000622 | < 1e-07  |
| 0.000631 | < 1e-07  |
| 0.000622 | 2.00E-04 |
| 0.00062  | < 1e-07  |
| 0.00062  | < 1e-07  |
| 0.000673 | < 1e-07  |
| 0.00067  | < 1e-07  |
| 0.000643 | < 1e-07  |
| 0.000641 | < 1e-07  |
| 0.000636 | < 1e-07  |
| 0.000673 | < 1e-07  |

|          |          |
|----------|----------|
| 0.000643 | < 1e-07  |
| 0.000706 | < 1e-07  |
| 0.000731 | < 1e-07  |
| 0.000708 | < 1e-07  |
| 0.000727 | < 1e-07  |
| 0.000708 | < 1e-07  |
| 0.000785 | < 1e-07  |
| 0.000787 | 1.00E-04 |
| 0.00076  | < 1e-07  |
| 0.000787 | < 1e-07  |
| 0.000802 | < 1e-07  |
| 0.000791 | < 1e-07  |
| 0.000829 | 1.00E-04 |
| 0.000817 | < 1e-07  |
| 0.000818 | < 1e-07  |
| 0.000843 | < 1e-07  |
| 0.000839 | < 1e-07  |
| 0.000902 | < 1e-07  |
| 0.000899 | 1.00E-04 |
| 0.000919 | < 1e-07  |
| 0.000888 | < 1e-07  |
| 0.000888 | < 1e-07  |
| 0.000939 | < 1e-07  |
| 0.000984 | < 1e-07  |
| 0.000984 | < 1e-07  |
| 0.000984 | < 1e-07  |
| 0.000987 | < 1e-07  |
| 0.001    | < 1e-07  |
