# Supplementary material
Source: PubMed Central journal article supplement (PMC3731981)
Supplement: supp_JCO.2012.45.6228_Supplemental_Table7_JCO.2012.45.6228.pdf [file supp_JCO.2012.45.6228_Supplemental_Table7_JCO.2012.45.6228.pdf]

**Supplemental Table7.** miR-155 associated gene expression signature for negatively correlated genes  
Correlation of miR-155 expression in combined older and younger CN-AML patients.  
42 negatively correlated (FDR<.001) genes, ordered by increasing correlation coefficient.

| ProbeSet                    | Symbol                       | Name                                                   | Correlation coefficient | Parametric p-value | FDR      |
|-----------------------------|------------------------------|--------------------------------------------------------|-------------------------|--------------------|----------|
| <a href="#">207871_s_at</a> | <a href="#">ST7</a>          | suppression of tumorigenicity 7                        | -0.388                  | < 1e-07            | < 1e-07  |
| <a href="#">228570_at</a>   | <a href="#">BTBD11</a>       | BTB (POZ) domain containing 11                         | -0.344                  | < 1e-07            | < 1e-07  |
| <a href="#">205934_at</a>   | <a href="#">PLCL1</a>        | phospholipase C-like 1                                 | -0.341                  | < 1e-07            | < 1e-07  |
| <a href="#">241816_at</a>   | <a href="#">C14orf106</a>    | chromosome 14 open reading frame 106                   | -0.337                  | 1.00E-07           | 2.19E-05 |
| <a href="#">224703_at</a>   | <a href="#">DCAF5</a>        | DDB1 and CUL4 associated factor 5                      | -0.333                  | 1.00E-07           | 2.19E-05 |
| <a href="#">203628_at</a>   | <a href="#">IGF1R</a>        | insulin-like growth factor 1 receptor                  | -0.333                  | 1.00E-07           | 2.19E-05 |
| <a href="#">222668_at</a>   | <a href="#">KCTD15</a>       | potassium channel tetramerisation domain containing 15 | -0.333                  | 1.00E-07           | 2.19E-05 |
| <a href="#">244352_at</a>   | <a href="#">CD84</a>         | CD84 molecule                                          | -0.33                   | 1.00E-07           | 2.19E-05 |
| <a href="#">226032_at</a>   | <a href="#">CASP2</a>        | caspase 2, apoptosis-related cysteine peptidase        | -0.318                  | 3.00E-07           | 5.62E-05 |
| <a href="#">205988_at</a>   | <a href="#">CD84</a>         | CD84 molecule                                          | -0.316                  | 4.00E-07           | 7.22E-05 |
| <a href="#">239223_s_at</a> | <a href="#">FBXL20</a>       | F-box and leucine-rich repeat protein 20               | -0.314                  | 5.00E-07           | 8.41E-05 |
| <a href="#">203486_s_at</a> | <a href="#">ARMC8</a>        | armadillo repeat containing 8                          | -0.313                  | 5.00E-07           | 8.41E-05 |
| <a href="#">226214_at</a>   | <a href="#">GDE1</a>         | glycerophosphodiester phosphodiesterase 1              | -0.313                  | 5.00E-07           | 8.41E-05 |
| <a href="#">1561146_at</a>  | <a href="#">VPS35</a>        | vacuolar protein sorting 35 homolog (S. cerevisiae)    | -0.312                  | 5.00E-07           | 8.41E-05 |
| <a href="#">211140_s_at</a> | <a href="#">CASP2</a>        | caspase 2, apoptosis-related cysteine peptidase        | -0.311                  | 6.00E-07           | 9.92E-05 |
| <a href="#">230391_at</a>   | <a href="#">CD84</a>         | CD84 molecule                                          | -0.304                  | 1.10E-06           | 0.000155 |
| <a href="#">225330_at</a>   | <a href="#">IGF1R</a>        | insulin-like growth factor 1 receptor                  | -0.304                  | 1.10E-06           | 0.000155 |
| <a href="#">228220_at</a>   | <a href="#">FCHO2</a>        | FCH domain only 2                                      | -0.301                  | 1.40E-06           | 0.00018  |
| <a href="#">209812_x_at</a> | <a href="#">CASP2</a>        | caspase 2, apoptosis-related cysteine peptidase        | -0.299                  | 1.60E-06           | 2.00E-04 |
| <a href="#">201605_x_at</a> | <a href="#">CNN2</a>         | calponin 2                                             | -0.299                  | 1.60E-06           | 2.00E-04 |
| <a href="#">213089_at</a>   | <a href="#">LOC100272216</a> | hypothetical LOC100272216                              | -0.298                  | 1.80E-06           | 0.000223 |
| <a href="#">211464_x_at</a> | <a href="#">CASP6</a>        | caspase 6, apoptosis-related cysteine peptidase        | -0.297                  | 1.90E-06           | 0.000229 |
| <a href="#">228497_at</a>   | <a href="#">SLC22A15</a>     | solute carrier family 22, member 15                    | -0.297                  | 1.90E-06           | 0.000229 |
| <a href="#">209790_s_at</a> | <a href="#">CASP6</a>        | caspase 6, apoptosis-related cysteine peptidase        | -0.296                  | 2.00E-06           | 0.000236 |
| <a href="#">222664_at</a>   | <a href="#">KCTD15</a>       | potassium channel tetramerisation domain containing 15 | -0.296                  | 2.10E-06           | 0.000242 |
| <a href="#">222895_s_at</a> | <a href="#">BCL11B</a>       | B-cell CLL/lymphoma 11B (zinc finger protein)          | -0.291                  | 3.10E-06           | 0.000326 |
| <a href="#">238929_at</a>   | <a href="#">SRSF8</a>        | serine/arginine-rich splicing factor 8                 | -0.29                   | 3.40E-06           | 0.000352 |
| <a href="#">238692_at</a>   | <a href="#">BTBD11</a>       | BTB (POZ) domain containing 11                         | -0.29                   | 3.50E-06           | 0.000353 |

|                              |                           |                                                                       |        |          |          |
|------------------------------|---------------------------|-----------------------------------------------------------------------|--------|----------|----------|
| <a href="#">223708_at</a>    | <a href="#">C1QTNF4</a>   | C1q and tumor necrosis factor related protein 4                       | -0.29  | 3.50E-06 | 0.000353 |
| <a href="#">238444_at</a>    | <a href="#">ZNF618</a>    | zinc finger protein 618                                               | -0.29  | 3.50E-06 | 0.000353 |
| <a href="#">225900_at</a>    | <a href="#">EXOC6B</a>    | exocyst complex component 6B                                          | -0.289 | 3.60E-06 | 0.000359 |
| <a href="#">223044_at</a>    | <a href="#">SLC40A1</a>   | solute carrier family 40 (iron-regulated transporter), member 1       | -0.288 | 4.00E-06 | 0.000382 |
| <a href="#">205883_at</a>    | <a href="#">ZBTB16</a>    | zinc finger and BTB domain containing 16                              | -0.288 | 4.00E-06 | 0.000382 |
| <a href="#">222000_at</a>    | <a href="#">C1orf174</a>  | chromosome 1 open reading frame 174                                   | -0.288 | 4.20E-06 | 0.000397 |
| <a href="#">225731_at</a>    | <a href="#">ANKRD50</a>   | ankyrin repeat domain 50                                              | -0.287 | 4.40E-06 | 0.000406 |
| <a href="#">215359_x_at</a>  | <a href="#">ZNF44</a>     | zinc finger protein 44                                                | -0.287 | 4.50E-06 | 0.00041  |
| <a href="#">209811_at</a>    | <a href="#">CASP2</a>     | caspase 2, apoptosis-related cysteine peptidase                       | -0.286 | 4.60E-06 | 0.000415 |
| <a href="#">37408_at</a>     | <a href="#">MRC2</a>      | mannose receptor, C type 2                                            | -0.286 | 4.90E-06 | 0.000438 |
| <a href="#">205830_at</a>    | <a href="#">CLGN</a>      | calmegin                                                              | -0.284 | 5.40E-06 | 0.00047  |
| <a href="#">227698_s_at</a>  | <a href="#">RAB40C</a>    | RAB40C, member RAS oncogene family                                    | -0.283 | 5.90E-06 | 0.000498 |
| <a href="#">219862_s_at</a>  | <a href="#">NARF</a>      | nuclear prelamin A recognition factor                                 | -0.283 | 6.10E-06 | 0.000511 |
| <a href="#">203627_at</a>    | <a href="#">IGF1R</a>     | insulin-like growth factor 1 receptor                                 | -0.282 | 6.40E-06 | 0.000527 |
| <a href="#">205240_at</a>    | <a href="#">GPSM2</a>     | G-protein signaling modulator 2                                       | -0.281 | 6.80E-06 | 0.000553 |
| <a href="#">215892_at</a>    | <a href="#">ZNF440</a>    | zinc finger protein 440                                               | -0.28  | 7.40E-06 | 0.000592 |
| <a href="#">206028_s_at</a>  | <a href="#">MERTK</a>     | c-met proto-oncogene tyrosine kinase                                  | -0.28  | 7.50E-06 | 0.000595 |
| <a href="#">208050_s_at</a>  | <a href="#">CASP2</a>     | caspase 2, apoptosis-related cysteine peptidase                       | -0.279 | 8.30E-06 | 0.000628 |
| <a href="#">218553_s_at</a>  | <a href="#">KCTD15</a>    | potassium channel tetramerisation domain containing 15                | -0.277 | 9.60E-06 | 0.000694 |
| <a href="#">222721_at</a>    | <a href="#">CNIH4</a>     | cornichon homolog 4 (Drosophila)                                      | -0.276 | 1.06E-05 | 0.000747 |
| <a href="#">228683_s_at</a>  | <a href="#">KCTD15</a>    | potassium channel tetramerisation domain containing 15                | -0.275 | 1.09E-05 | 0.00076  |
| <a href="#">209585_s_at</a>  | <a href="#">MINPP1</a>    | multiple inositol-polyphosphate phosphatase 1                         | -0.275 | 1.09E-05 | 0.00076  |
| <a href="#">204072_s_at</a>  | <a href="#">FRY</a>       | furry homolog (Drosophila)                                            | -0.274 | 1.18E-05 | 0.000806 |
| <a href="#">209296_at</a>    | <a href="#">PPM1B</a>     | protein phosphatase, Mg <sup>2+</sup> /Mn <sup>2+</sup> dependent, 1B | -0.274 | 1.21E-05 | 0.000818 |
| <a href="#">201178_at</a>    | <a href="#">FBXO7</a>     | F-box protein 7                                                       | -0.273 | 1.29E-05 | 0.000857 |
| <a href="#">1561130_at</a>   | <a href="#">C12orf51</a>  | chromosome 12 open reading frame 51                                   | -0.272 | 1.35E-05 | 0.000888 |
| <a href="#">226630_at</a>    | <a href="#">C14orf106</a> | chromosome 14 open reading frame 106                                  | -0.272 | 1.36E-05 | 0.000892 |
| <a href="#">238917_s_at</a>  | <a href="#">DENND5B</a>   | DENN/MADD domain containing 5B                                        | -0.272 | 1.40E-05 | 0.000906 |
| <a href="#">1555153_s_at</a> | <a href="#">FCHO2</a>     | FCH domain only 2                                                     | -0.272 | 1.42E-05 | 0.000916 |
| <a href="#">205268_s_at</a>  | <a href="#">ADD2</a>      | adducin 2 (beta)                                                      | -0.27  | 1.56E-05 | 0.000984 |
