# Supplementary material
Source: PubMed Central journal article supplement (PMC3731981)
Supplement: supp_JCO.2012.45.6228_Supplemental_Text_JCO.2012.45.6228.pdf [file supp_JCO.2012.45.6228_Supplemental_Text_JCO.2012.45.6228.pdf]

**The Clinical Role of microRNAs in Cytogenetically Normal Acute Myeloid Leukemia:  
miR-155 Upregulation Independently Identifies High-Risk Patients**

**Marcucci, et al**

## Supplemental Text

The Clinical Role of microRNAs in Cytogenetically Normal Acute Myeloid Leukemia:

*miR-155* Upregulation Independently Identifies High-Risk Patients

Marcucci et al.

### *Participating institutions*

The following CALGB/Alliance institutions participated in this study and contributed at least 1% of patients. For each of these institutions current principal investigators are listed.

The Ohio State University Medical Center, Columbus, OH: Clara D. Bloomfield (grant no. U10CA077658); Wake Forest University School of Medicine, Winston-Salem, NC: David D. Hurd; North Shore University Hospital, Manhasset, NY: Daniel R. Budman (grant no. U10CA035279); Duke University Medical Center, Durham, NC: Jeffrey Crawford (grant no. U10CA047577); Roswell Park Cancer Institute, Buffalo, NY: Ellis G. Levine (grant no. U10CA059518); University of Iowa Hospitals, Iowa City, IA: Daniel A. Vaena; Washington University School of Medicine, St. Louis, MO: Nancy L. Bartlett (grant no. U10CA077440); University of Chicago Medical Center, Chicago, IL: Hedy L. Kindler (grant no. U10CA041287); Vermont Cancer Center, Burlington, VT: Steven M. Grunberg; University of Massachusetts Medical Center, Worcester, MA: William V. Walsh; Dana Farber Cancer Institute, Boston, MA: Harold J. Burstein (grant no. U10CA032291); Ft. Wayne Medical Oncology/Hematology, Ft. Wayne, IN: Sreenivasa Nattam; Dartmouth Medical School, Lebanon, NH: Konstantin Dragnev; Eastern Maine

Medical Center, Bangor, ME: Thomas H. Openshaw; University of North Carolina, Chapel Hill, NC: Thomas C. Shea (grant no. U10CA047559); Weill Medical College of Cornell University, New York, NY: John Leonard; Mount Sinai School of Medicine, New York, NY: Lewis R. Silverman; Rhode Island Hospital, Providence, RI: William Sikov; SUNY Upstate Medical University, Syracuse, NY: Stephen L. Graziano; Moores University of California San Diego Cancer Center, San Diego, CA: Barbara A. Parker; University of Missouri/Ellis Fischel Cancer Center, Columbia, MO: Carl E. Freter; University of Maryland Cancer Center, Baltimore, MD: Martin J. Edelman; Christiana Care Health Services, Inc., Newark, DE: Stephen S. Grubbs; Western Pennsylvania Hospital, Pittsburgh, PA: John Lister.

### *Patients' Treatment*

All patients received cytarabine-daunorubicin-based induction chemotherapy. Patients younger than 60 years were treated on Cancer and Leukemia Group B (CALGB) trials 9621<sup>1,2</sup> or 19808.<sup>3</sup> These patients received induction chemotherapy with cytarabine, daunorubicin, and etoposide with or without PSC-833 (valspodar), a multidrug resistance protein inhibitor. On achievement of complete remission (CR), the patients were assigned to intensification with high-dose cytarabine and etoposide for stem-cell mobilization followed by myeloablative treatment with busulfan and etoposide supported by autologous stem-cell transplantation (SCT). Older patients (≥60 years) were treated with less intense regimens on CALGB protocols 8525,<sup>4</sup> 8923,<sup>5</sup> 9420,<sup>6</sup> 9720,<sup>7,8</sup> or 10201.<sup>9</sup> Patients treated on protocols CALGB 8525<sup>4</sup> and 8923<sup>5</sup> received induction therapy with cytarabine and daunorubicin. All patients achieving CR were randomly

assigned to postremission therapy consisting of four cycles of cytarabine in standard, intermediate, or high dose, followed by four cycles of maintenance therapy with cytarabine and daunorubicin on CALGB 8525,<sup>4</sup> and four cycles of standard-dose cytarabine or two cycles of mitoxantrone plus intermediate-dose cytarabine on CALGB 8923.<sup>5</sup> Protocols CALGB 9420, 9720, and 10201 included investigational agents other than chemotherapy. CALGB 9720 was initiated as a phase III trial in untreated acute myeloid leukemia (AML) patients 60 years and older evaluating multidrug resistance (MDR) modulation by valspodar during induction with cytarabine, daunorubicin and etoposide, and consolidation therapy, which consisted of a single course of postremission chemotherapy similar to the initial induction regimen, except that cytarabine was given for 5 rather than 7 days and there were 2 rather than 3 doses of daunorubicin and etoposide.<sup>7,8</sup> Similar consolidation therapy, ie, one course of attenuated induction chemotherapy was also received by patients on CALGB 9420.<sup>6</sup> The valspodar arm of CALGB 9720 was closed after randomized assignment of 120 patients because of excessive early deaths. Enrollment on this protocol continued on the chemotherapy-only control arm. CALGB 9420 and CALGB 9720 also evaluated a subcutaneous interleukin-2 regimen as maintenance therapy, which was demonstrated to induce no clear benefit.<sup>7,8</sup> CALGB 10201 evaluated the *BCL2* antisense, oblimersen sodium (Genasense; G3139) administered with induction (cytarabine and daunorubicin) and consolidation (two cycles of higher dose cytarabine) chemotherapy; preliminary results showed no impact of the antisense on outcome.<sup>9</sup> Per the protocols, no younger or older patients enrolled on these studies received allogeneic SCT during first CR.

### *Definition of clinical endpoints*

Clinical endpoints were defined according to generally accepted criteria.<sup>10</sup> Per protocol, all patients were to receive at least one induction cycle. For patients with residual leukemia present in a bone marrow biopsy after one induction cycle, a second cycle of induction was administered. CR required a bone marrow (BM) aspirate with cellularity >20% with maturation of all cell lines, <5% blasts and undetectable Auer rods; no circulating leukemic blasts, blood neutrophil count  $\geq 1.5 \times 10^9/L$  and platelets  $>100 \times 10^9/L$ , and no evidence of extramedullary leukemia, all of which had to persist ~~for~~ weeks. Relapse was defined by >5% blasts in BM aspirates or the development of extramedullary leukemia in patients with previously documented CR.<sup>10</sup> Disease-free survival (DFS) was measured from the date of CR until the date of relapse or death (from any cause); patients alive and in CR were censored at last follow-up. Overall survival (OS) was measured from the date of study entry until the date of death (from any cause), and patients alive at last follow-up were censored.

### *Multivariable models*

Variables that were significant at  $P < .2$  in the univariable models and considered for multivariable model inclusion were as follows. In the model for achievement of CR in all patients: *miR-155* (high v low), *NPM1* (mutated v wild-type), *FLT3-ITD* (positive v negative), *WT1* (mutated v wild-type), *TET2* (mutated v wild-type), *ASXL1* (mutated v wild-type), *RUNX1* (mutated v wild-type), *ERG* (high v low), *BAALC* (high v low), hemoglobin (continuous), WBC (continuous, 50-unit increase) and age group  $\geq 60$  v  $<60$ ). In the model for DFS in all patients: *miR-155* (high v low), *NPM1* (mutated v wild-

type), *FLT3*-ITD (positive v negative), *WT1* (mutated v wild-type), *DNMT3A* (mutated v wild-type), *MLL*-PTD (positive v negative), *RUNX1* (mutated v wild-type), *ERG* (high v low), *BAALC* (high v low), WBC (continuous, 50-unit increase), race (white v nonwhite) and age group  $\geq 60$  v  $< 60$ ). In the model for OS in all patients: *miR-155* (high v low), *NPM1* (mutated v wild-type), *FLT3*-ITD (positive v negative), *WT1* (mutated v wild-type), *ASXL1* (mutated v wild-type), *DNMT3A* (mutated v wild-type), *RUNX1* (mutated v wild-type), *IDH1* (mutated v wild-type), *ERG* (high v low), *BAALC* (high v low), WBC (continuous, 50-unit increase), race (white v nonwhite) and age group  $\geq 60$  v  $< 60$ ). In the model for achievement of CR in patients aged  $< 60$  years: *miR-155* (high v low), *FLT3*-ITD (positive v negative), *CEBPA* (mutated v wild-type), *TET2* (mutated v wild-type), *ASXL1* (mutated v wild-type), *RUNX1* (mutated v wild-type), *IDH2* (mutated v wild-type), *ERG* (high v low), *BAALC* (high v low), hemoglobin (continuous), WBC (continuous, 50-unit increase) and age (continuous, 10-year increase). In the model for DFS in patients aged  $< 60$  years: *miR-155* (high v low), *FLT3*-ITD (positive v negative), *FLT3*-TKD (positive v negative), *WT1* (mutated v wild-type), *MLL*-PTD (positive v negative), *RUNX1* (mutated v wild-type), *IDH1* (mutated v wild-type), *IDH2* (mutated v wild-type), *ERG* (high v low), *BAALC* (high v low), WBC (continuous, 50-unit increase) and race (white v nonwhite). In the model for OS in patients aged  $< 60$  years: *miR-155* (high v low), *NPM1* (mutated v wild-type), *FLT3*-ITD (positive v negative), *CEBPA* (mutated v wild-type), *WT1* (mutated v wild-type), *TET2* (mutated v wild-type), *RUNX1* (mutated v wild-type), *IDH1* (mutated v wild-type), *ERG* (high v low), *BAALC* (high v low), hemoglobin (continuous), WBC (continuous, 50-unit increase) and race (white v nonwhite). In the model for achievement of CR in patients aged  $\geq 60$  years: *miR-155*

(high v low), *NPM1* (mutated v wild-type), *WT1* (mutated v wild-type), *ASXL1* (mutated v wild-type), *RUNX1* (mutated v wild-type), *ERG* (high v low), *BAALC* (high v low), WBC (continuous, 50-unit increase) and age (continuous, 10-year increase). In the model for DFS in patients aged  $\geq 60$  years: *miR-155* (high v low), *NPM1* (mutated v wild-type), *FLT3-ITD* (positive v negative), *FLT3-TKD* (positive v negative), *ASXL1* (mutated v wild-type), *ERG* (high v low) and *BAALC* (high v low). In the model for OS in patients aged  $\geq 60$  years: *miR-155* (high v low), *NPM1* (mutated v wild-type), *FLT3-ITD* (positive v negative), *WT1* (mutated v wild-type), *ASXL1* (mutated v wild-type), *RUNX1* (mutated v wild-type), *ERG* (high v low), *BAALC* (high v low) and WBC (continuous, 50-unit increase).

#### *Information on missing samples*

The patients included in our study were compared with those who were not included because of lack of available material. The two groups were similar for age ( $P=.27$ ), sex ( $P=.89$ ), race ( $P=.33$ ), hemoglobin ( $P=.86$ ), and platelets ( $P=.55$ ). The patients included in the present study had higher WBC ( $P<.001$ ), blood blasts ( $P<.001$ ), and BM blasts ( $P<.001$ ) compared with the patients that were not included. This was not unexpected, as patients with higher WBC and blood and BM blasts usually have more material that can be banked and utilized for correlative studies.

## SUPPLEMENTAL REFERENCES

1. Kolitz JE, George SL, Dodge RK, et al: Dose escalation studies of cytarabine, daunorubicin, and etoposide with and without multidrug resistance modulation with PSC-833 in untreated adults with acute myeloid leukemia younger than 60 years: Final induction results of Cancer and Leukemia Group B Study 9621. *J Clin Oncol* 22:4290-4301, 2004
2. Kolitz JE, George SL, Barrier R, et al: A novel post-remission consolidation regimen for patients with acute myeloid leukemia (AML) < 60 years old with normal or unfavorable cytogenetics: Results from CALGB 9621. *Blood* 102:175a, 2003 (abstr 609)
3. Kolitz JE, George SL, Marcucci G, et al: P-glycoprotein inhibition using valspodar (PSC-833) does not improve outcomes for patients under age 60 years with newly diagnosed acute myeloid leukemia: Cancer and Leukemia Group B study 19808. *Blood* 116:1413-1421, 2010
4. Mayer RJ, Davis RB, Schiffer CA, et al: Intensive postremission chemotherapy in adults with acute myeloid leukemia. *N Engl J Med* 331:896-903, 1994
5. Stone RM, Berg DT, George SL, et al. Postremission therapy in older patients with de novo acute myeloid leukemia: A randomized trial comparing mitoxantrone and intermediate-dose cytarabine with standard-dose cytarabine. *Blood* 98:548-553, 2001
6. Lee EJ, George SL, Caligiuri M, et al: Parallel phase I studies of daunorubicin given with cytarabine and etoposide with or without the multidrug resistance



- modulator PSC-833 in previously untreated patients 60 years of age or older with acute myeloid leukemia: Results of Cancer and Leukemia Group B study 9420. *J Clin Oncol* 17:2831-2839, 1999
7. Baer MR, George SL, Dodge RK, et al: Phase 3 study of the multidrug resistance modulator PSC-833 in previously untreated patients 60 years of age and older with acute myeloid leukemia: Cancer and Leukemia Group B study 9720. *Blood* 100:1224-1232, 2002
  8. Baer MR, George SL, Caligiuri MA, et al: Low-dose interleukin-2 immunotherapy does not improve outcome of patients age 60 years and older with acute myeloid leukemia in first complete remission: Cancer and Leukemia Group B study 9720. *J Clin Oncol* 26:4934-4939, 2008
  9. Marcucci G, Moser B, Blum W, et al: A phase III randomized trial of intensive induction and consolidation chemotherapy  $\pm$  oblimersen, a proapoptotic Bcl-2 antisense oligonucleotide in untreated acute myeloid leukemia patients  $>60$  years old. *J Clin Oncol* 25:360s, 2007 (suppl; abstr 7012)
  10. Cheson BD, Cassileth PA, Head DR, et al: Report of the National Cancer Institute-sponsored workshop on definitions of diagnosis and response in acute myeloid leukemia. *J Clin Oncol* 8:813-819, 1990

## SUPPLEMENTAL TABLES

**Supplemental Table 1.** Comparison of Clinical and Molecular Characteristics Associated With *miR155* expression in younger (<60 years) Patients With Primary Cytogenetically Normal Acute Myeloid Leukemia

| Characteristic                          | Low <i>miR155</i> <sup>†</sup><br>(n=77) | High <i>miR155</i> <sup>†</sup><br>(n=76) | <i>P</i> |
|-----------------------------------------|------------------------------------------|-------------------------------------------|----------|
| Age, years                              |                                          |                                           | .84      |
| Median                                  | 45                                       | 46                                        |          |
| Range                                   | 19-59                                    | 18-59                                     |          |
| Male sex, no. (%)                       | 35 (45)                                  | 38 (50)                                   | .63      |
| Race, no. (%)                           |                                          |                                           | .31      |
| White                                   | 66 (86)                                  | 70 (92)                                   |          |
| Nonwhite                                | 11 (14)                                  | 6 (8)                                     |          |
| WBC, x10 <sup>9</sup> /L                |                                          |                                           | .01      |
| Median                                  | 20.4                                     | 32.3                                      |          |
| Range                                   | 0.9-295.0                                | 1.4-273.0                                 |          |
| Blood blasts, %                         |                                          |                                           | .09      |
| Median                                  | 55                                       | 66                                        |          |
| Range                                   | 0-97                                     | 0-97                                      |          |
| Bone marrow blasts, %                   |                                          |                                           | .11      |
| Median                                  | 63                                       | 70                                        |          |
| Range                                   | 10-94                                    | 21-95                                     |          |
| Hemoglobin, g/dL                        |                                          |                                           | .38      |
| Median                                  | 9.4                                      | 9.1                                       |          |
| Range                                   | 4.9-13.4                                 | 4.6-13.3                                  |          |
| Platelet count, x10 <sup>9</sup> /L     |                                          |                                           | .24      |
| Median                                  | 70                                       | 57                                        |          |
| Range                                   | 11-445                                   | 8-380                                     |          |
| Extramedullary involvement, no. (%)     | 22 (29)                                  | 21 (28)                                   | 1.00     |
| <i>NPM1</i> , no. (%)                   |                                          |                                           | .24      |
| Mutated                                 | 46 (60)                                  | 53 (70)                                   |          |
| Wild-type                               | 31 (40)                                  | 23 (30)                                   |          |
| <i>FLT3</i> -ITD, no. (%)               |                                          |                                           | <.001    |
| Present                                 | 14 (18)                                  | 45 (59)                                   |          |
| Absent                                  | 63 (82)                                  | 31 (41)                                   |          |
| <i>CEBPA</i> , no. (%)                  |                                          |                                           | .02      |
| Mutated                                 | 21 (27)                                  | 9 (12)                                    |          |
| Single mutated                          | 4                                        | 7                                         |          |
| Double mutated                          | 17                                       | 2                                         |          |
| Wild-type                               | 56 (73)                                  | 67 (88)                                   |          |
| ELN Genetic Group, no. (%) <sup>*</sup> |                                          |                                           | <.001    |
| Favorable                               | 55 (71)                                  | 25 (33)                                   |          |
| Intermediate-I                          | 22 (29)                                  | 51 (67)                                   |          |

| Characteristic                                      | Low <i>miR155</i> <sup>†</sup><br>(n=77) | High <i>miR155</i> <sup>†</sup><br>(n=76) | <i>P</i> |
|-----------------------------------------------------|------------------------------------------|-------------------------------------------|----------|
| <i>TET2</i> , no. (%)                               |                                          |                                           | .28      |
| Mutated                                             | 10 (13)                                  | 15 (20)                                   |          |
| Wild-type                                           | 67 (87)                                  | 61 (80)                                   |          |
| <i>ASXL1</i> , no. (%)                              |                                          |                                           | .21      |
| Mutated                                             | 1 (1)                                    | 4 (5)                                     |          |
| Wild-type                                           | 75 (99)                                  | 71 (95)                                   |          |
| <i>DNMT3A</i> , no. (%)                             |                                          |                                           | .87      |
| Mutated                                             | 28 (38)                                  | 26 (36)                                   |          |
| R882                                                | 22                                       | 19                                        |          |
| Non-R882                                            | 6                                        | 7                                         |          |
| Wild-type                                           | 46 (62)                                  | 46 (64)                                   |          |
| <i>RUNX1</i> , no. (%)                              |                                          |                                           | .09      |
| Mutated                                             | 4 (5)                                    | 10 (15)                                   |          |
| Wild-type                                           | 67 (95)                                  | 58 (85)                                   |          |
| <i>IDH1</i> , no. (%)                               |                                          |                                           | .30      |
| Mutated                                             | 6 (8)                                    | 10 (13)                                   |          |
| Wild-type                                           | 70 (92)                                  | 64 (87)                                   |          |
| <i>IDH2</i> , no. (%)                               |                                          |                                           | .12      |
| <i>IDH2</i> mutated                                 | 12 (16)                                  | 5 (7)                                     |          |
| Codon R140 mutation                                 | 9                                        | 5                                         |          |
| Codon R172 mutation                                 | 3                                        | 0                                         |          |
| Wild-type                                           | 64 (84)                                  | 69 (93)                                   |          |
| <i>FLT3</i> -TKD, no. (%)                           |                                          |                                           | .009     |
| Present                                             | 12 (16)                                  | 2 (3)                                     |          |
| Absent                                              | 65 (84)                                  | 74 (97)                                   |          |
| <i>WT1</i> , no. (%)                                |                                          |                                           | .25      |
| Mutated                                             | 8 (10)                                   | 13 (17)                                   |          |
| Wild-type                                           | 69 (90)                                  | 63 (83)                                   |          |
| <i>MLL</i> -PTD, no. (%)                            |                                          |                                           | .37      |
| Present                                             | 4 (5)                                    | 7 (9)                                     |          |
| Absent                                              | 73 (95)                                  | 69 (91)                                   |          |
| <i>ERG</i> expression group, no. (%) <sup>†</sup>   |                                          |                                           | .02      |
| High                                                | 31 (40)                                  | 45 (59)                                   |          |
| Low                                                 | 46 (60)                                  | 31 (41)                                   |          |
| <i>BAALC</i> expression group, no. (%) <sup>†</sup> |                                          |                                           | .26      |
| High                                                | 35 (45)                                  | 42 (55)                                   |          |
| Low                                                 | 42 (55)                                  | 34 (45)                                   |          |

Abbreviations: ELN, European LeukemiaNet; *FLT3*-ITD, internal tandem duplication of the *FLT3* gene; *FLT3*-TKD, tyrosine kinase domain mutation in the *FLT3* gene; *MLL*-PTD, partial tandem duplication of the *MLL* gene; WBC, white blood count.

\* Within CN-AML patients, the ELN Favorable Genetic Group comprises patients with mutated *CEBPA*, and/or mutated *NPM1* without *FLT3*-ITD. All remaining CN-AML patients (ie, those with wild-type *CEBPA*, and *NPM1*-mutated with *FLT3*-ITD or with wild-type *NPM1* with or without *FLT3*-ITD) belong to the ELN Intermediate-I Genetic Group.

<sup>†</sup> The median expression value was used as a cut point.

**Supplemental Table 2.** Comparison of Clinical and Molecular Characteristics Associated With *miR155* expression in Older ( $\geq 60$  years) Patients With Primary Cytogenetically Normal Acute Myeloid Leukemia

| Characteristic                          | Low <i>miR155</i> <sup>†</sup><br>(n=105) | High <i>miR155</i> <sup>†</sup><br>(n=105) | <i>P</i> |
|-----------------------------------------|-------------------------------------------|--------------------------------------------|----------|
| Age, years                              |                                           |                                            | .15      |
| Median                                  | 70                                        | 68                                         |          |
| Range                                   | 60-83                                     | 60-81                                      |          |
| Male sex, no. (%)                       | 59 (56)                                   | 52 (50)                                    | .41      |
| Race, no. (%)                           |                                           |                                            | .63      |
| White                                   | 94 (92)                                   | 94 (90)                                    |          |
| Nonwhite                                | 8 (8)                                     | 11 (10)                                    |          |
| WBC, $\times 10^9/L$                    |                                           |                                            | .007     |
| Median                                  | 22.2                                      | 39.1                                       |          |
| Range                                   | 0.8-249.3                                 | 1.0-450.0                                  |          |
| Blood blasts, %                         |                                           |                                            | .02      |
| Median                                  | 42                                        | 62                                         |          |
| Range                                   | 0-97                                      | 0-99                                       |          |
| Bone marrow blasts, %                   |                                           |                                            | <.001    |
| Median                                  | 60                                        | 76                                         |          |
| Range                                   | 4-97                                      | 6-97                                       |          |
| Hemoglobin, g/dL                        |                                           |                                            | .70      |
| Median                                  | 9.3                                       | 9.4                                        |          |
| Range                                   | 5.4-14.5                                  | 6.0-15.0                                   |          |
| Platelet count, $\times 10^9/L$         |                                           |                                            | .55      |
| Median                                  | 70                                        | 67                                         |          |
| Range                                   | 4-481                                     | 11-850                                     |          |
| Extramedullary involvement, no. (%)     | 21 (21)                                   | 30 (29)                                    | .20      |
| <i>NPM1</i> , no. (%)                   |                                           |                                            | .88      |
| Mutated                                 | 63 (62)                                   | 64 (63)                                    |          |
| Wild-type                               | 39 (38)                                   | 37 (37)                                    |          |
| <i>FLT3</i> -ITD, no. (%)               |                                           |                                            | <.001    |
| Present                                 | 23 (22)                                   | 52 (51)                                    |          |
| Absent                                  | 80 (78)                                   | 49 (49)                                    |          |
| <i>CEBPA</i> , no. (%)                  |                                           |                                            | .09      |
| Mutated                                 | 17 (17)                                   | 8 (8)                                      |          |
| Single mutated                          | 10                                        | 5                                          |          |
| Double mutated                          | 7                                         | 3                                          |          |
| Wild-type                               | 85 (83)                                   | 93 (92)                                    |          |
| ELN Genetic Group, no. (%) <sup>*</sup> |                                           |                                            | <.001    |
| Favorable                               | 64 (63)                                   | 30 (30)                                    |          |
| Intermediate-I                          | 38 (37)                                   | 70 (70)                                    |          |
| <i>TET2</i> , no. (%)                   |                                           |                                            | 1.00     |
| Mutated                                 | 32 (32)                                   | 31 (31)                                    |          |
| Wild-type                               | 67 (68)                                   | 68 (69)                                    |          |

| Characteristic                                      | Low <i>miR155</i> <sup>†</sup><br>(n=105) | High <i>miR155</i> <sup>†</sup><br>(n=105) | <i>P</i> |
|-----------------------------------------------------|-------------------------------------------|--------------------------------------------|----------|
| <i>ASXL1</i> , no. (%)                              |                                           |                                            | .84      |
| Mutated                                             | 15 (15)                                   | 13 (13)                                    |          |
| Wild-type                                           | 85 (85)                                   | 86 (87)                                    |          |
| <i>DNMT3A</i> , no. (%)                             |                                           |                                            | .13      |
| Mutated                                             | 29 (29)                                   | 37 (39)                                    |          |
| R882                                                | 14                                        | 25                                         |          |
| Non-R882                                            | 15                                        | 12                                         |          |
| Wild-type                                           | 72 (71)                                   | 58 (61)                                    |          |
| <i>RUNX1</i> , no. (%)                              |                                           |                                            | <.001    |
| Mutated                                             | 5 (5)                                     | 23 (25)                                    |          |
| Wild-type                                           | 90 (95)                                   | 70 (75)                                    |          |
| <i>IDH1</i> , no. (%)                               |                                           |                                            | .37      |
| Mutated                                             | 9 (9)                                     | 13 (13)                                    |          |
| Wild-type                                           | 93 (91)                                   | 87 (87)                                    |          |
| <i>IDH2</i> , no. (%)                               |                                           |                                            | .02      |
| <i>IDH2</i> mutated                                 | 32 (31)                                   | 17 (17)                                    |          |
| Codon R140 mutation                                 | 27                                        | 15                                         |          |
| Codon R172 mutation                                 | 5                                         | 2                                          |          |
| Wild-type                                           | 70 (69)                                   | 83 (83)                                    |          |
| <i>FLT3</i> -TKD, no. (%)                           |                                           |                                            | 1.00     |
| Present                                             | 12 (12)                                   | 11 (11)                                    |          |
| Absent                                              | 90 (88)                                   | 93 (89)                                    |          |
| <i>WT1</i> , no. (%)                                |                                           |                                            | .05      |
| Mutated                                             | 3 (3)                                     | 10 (10)                                    |          |
| Wild-type                                           | 99 (97)                                   | 90 (90)                                    |          |
| <i>MLL</i> -PTD, no. (%)                            |                                           |                                            | <.001    |
| Present                                             | 6 (6)                                     | 7 (7)                                      |          |
| Absent                                              | 97 (94)                                   | 98 (93)                                    |          |
| <i>ERG</i> expression group, no. (%) <sup>†</sup>   |                                           |                                            | .27      |
| High                                                | 48 (46)                                   | 57 (54)                                    |          |
| Low                                                 | 57 (54)                                   | 48 (46)                                    |          |
| <i>BAALC</i> expression group, no. (%) <sup>†</sup> |                                           |                                            | .002     |
| High                                                | 41 (39)                                   | 64 (61)                                    |          |
| Low                                                 | 64 (61)                                   | 41 (39)                                    |          |

Abbreviations: ELN, European LeukemiaNet; *FLT3*-ITD, internal tandem duplication of the *FLT3* gene; *FLT3*-TKD, tyrosine kinase domain mutation in the *FLT3* gene; *MLL*-PTD, partial tandem duplication of the *MLL* gene; WBC, white blood count.

\* Within CN-AML patients, the ELN Favorable Genetic Group comprises patients with mutated *CEBPA*, and/or mutated *NPM1* without *FLT3*-ITD. All remaining CN-AML patients (ie, those with wild-type *CEBPA*, and *NPM1*-mutated with *FLT3*-ITD or with wild-type *NPM1* with or without *FLT3*-ITD) belong to the ELN Intermediate-I Genetic Group.

<sup>†</sup> The median expression value was used as a cut point.

**Supplemental Table 3. Complete Remission Rates, Relapse Rates, Death Rates, and Disease-Free and Overall Survival in High versus Low *miR-155* Expressers**

| End Point                          | Low<br><i>miR-155</i> * | High<br><i>miR-155</i> * | <i>P</i> |
|------------------------------------|-------------------------|--------------------------|----------|
| <b>Younger patients (n=153)</b>    |                         |                          |          |
| No. of patients                    | 77                      | 76                       |          |
| Complete remission rate, no. (%)   | 69 (90)                 | 58 (76)                  | .03      |
| Relapse rate, no. (%)              | 31 (45)                 | 42 (72)                  | .002     |
| Number expired, no. (%)            | 35 (45)                 | 56 (74)                  | <.001    |
| Disease-free survival              |                         |                          | <.001    |
| Median, years                      | NR                      | 0.7                      |          |
| % disease-free at 3 years (95% CI) | 58 (45 to 69)           | 31 (20 to 43)            |          |
| % disease-free at 5 years (95% CI) | 55 (43 to 66)           | 27 (17 to 39)            |          |
| Overall survival                   |                         |                          | <.001    |
| Median, years                      | NR                      | 1.2                      |          |
| % alive at 3 years, (95% CI)       | 64 (52 to 73)           | 32 (22 to 42)            |          |
| % alive at 5 years, (95% CI)       | 57 (45 to 67)           | 28 (19 to 39)            |          |
| <b>Older patients (n=210)</b>      |                         |                          |          |
| No. of patients                    | 105                     | 105                      |          |
| Complete remission rate, no. (%)   | 81 (77)                 | 62 (59)                  | .008     |
| Relapse rate, no. (%)              | 69 (85)                 | 55 (89)                  | .62      |
| Number expired, no. (%)            | 91 (87)                 | 100 (95)                 | .05      |
| Disease-free survival              |                         |                          | .26      |
| Median, years                      | 1.0                     | 0.6                      |          |
| % disease-free at 3 years (95% CI) | 19 (11 to 28)           | 18 (9 to 28)             |          |
| Overall survival                   |                         |                          | <.001    |
| Median, years                      | 1.5                     | 0.8                      |          |
| % alive at 3 years (95% CI)        | 25 (17 to 33)           | 15 (9 to 23)             |          |

Abbreviations: CI, confidence interval; NR, not reached.

\* The median expression value was used as a cut point. Gene expression was measured using NanoString.

**Supplemental Table 4.** Multivariable Model Limited to Patients With Measured Expression Level of *miR-181a* (n=298)

| Group                                  | Overall Survival |              |       |
|----------------------------------------|------------------|--------------|-------|
|                                        | HR               | 95% CI       | P     |
| <i>miR-155</i> expression, high v low  | 1.95             | 1.46 to 2.61 | <.001 |
| <i>miR-181a</i> expression, continuous | 0.80             | 0.71 to 0.90 | <.001 |
| <i>FLT3</i> -ITD, positive v negative  | 1.43             | 1.06 to 1.94 | .02   |
| <i>WT1</i> , mutated v wild-type       | 2.03             | 1.26 to 3.26 | .004  |
| <i>IDH1</i> , mutated v wild-type      | 1.58             | 1.05 to 2.39 | .03   |
| <i>ERG</i> expression, high v low      | 1.47             | 1.09 to 1.98 | .01   |
| <i>BAALC</i> expression, high v low    | 1.92             | 1.41 to 2.60 | <.001 |
| WBC, each 50 units                     | 1.12             | 1.02 to 1.22 | .02   |
| Age group, older v younger             | 3.66             | 2.67 to 5.01 | <.001 |

NOTE: Hazard ratios greater than (less than) 1.0 indicate higher (lower) risk for death for the higher values of the continuous variables and the first category listed for the categorical variables.

Abbreviations: OR, odds ratio; HR, hazard ratio; CI, confidence interval; WBC, white blood count.

**Supplemental Table 5.** Complete Remission Rates and Disease-Free and Overall Survival in High versus Low *miR-155* Expressers According to the European LeukemiaNet Genetic Groups

| End Point                          | Favorable*                         |                                     |          | Intermediate-I*                    |                                     |          |
|------------------------------------|------------------------------------|-------------------------------------|----------|------------------------------------|-------------------------------------|----------|
|                                    | Low<br><i>miR-155</i> <sup>†</sup> | High<br><i>miR-155</i> <sup>†</sup> | <i>P</i> | Low<br><i>miR-155</i> <sup>†</sup> | High<br><i>miR-155</i> <sup>†</sup> | <i>P</i> |
| <b>Younger patients (n=153)</b>    |                                    |                                     |          |                                    |                                     |          |
| No. of patients                    | 55                                 | 25                                  |          | 22                                 | 51                                  |          |
| Complete remission rate, no. (%)   | 53 (96)                            | 20 (80)                             | .03      | 16 (73)                            | 38 (75)                             | .99      |
| Disease-free survival              |                                    |                                     | .04      |                                    |                                     | .41      |
| Median, years                      | NR                                 | 3.5                                 |          | 1.1                                | 0.7                                 |          |
| % disease-free at 3 years (95% CI) | 68 (54 to 79)                      | 50 (27 to 69)                       |          | 25 (8 to 47)                       | 21 (10 to 35)                       |          |
| % disease-free at 5 years (95% CI) | 66 (52 to 77)                      | 45 (23 to 65)                       |          | 19 (5 to 41)                       | 18 (8 to 32)                        |          |
| Overall survival                   |                                    |                                     | .02      |                                    |                                     | .20      |
| Median, y                          | NR                                 | 3.4                                 |          | 1.4                                | 0.9                                 |          |
| % alive at 3 years, (95% CI)       | 75 (61 to 84)                      | 52 (31 to 69)                       |          | 36 (17 to 56)                      | 22 (12 to 34)                       |          |
| % alive at 5 years, (95% CI)       | 71 (57 to 81)                      | 48 (28 to 66)                       |          | 23 (8 to 41)                       | 17 (8 to 29)                        |          |
| <b>Older patients (n=202)</b>      |                                    |                                     |          |                                    |                                     |          |
| No. of patients                    | 64                                 | 30                                  |          | 38                                 | 70                                  |          |
| Complete remission rate, no. (%)   | 53 (83)                            | 21 (70)                             | .18      | 26 (68)                            | 38 (54)                             | .22      |
| Disease-free survival              |                                    |                                     | .68      |                                    |                                     | .83      |
| Median, years                      | 1.1                                | 1.1                                 |          | 0.6                                | 0.6                                 |          |
| % disease-free at 3 years (95% CI) | 25 (14 to 37)                      | 24 (9 to 43)                        |          | 8 (1 to 22)                        | 13 (5 to 26)                        |          |
| Overall survival                   |                                    |                                     | .06      |                                    |                                     | .05      |
| Median, years                      | 1.8                                | 1.2                                 |          | 1.1                                | 0.6                                 |          |
| % alive at 3 years (95% CI)        | 34 (23 to 46)                      | 23 (10 to 39)                       |          | 11 (3 to 23)                       | 11 (5 to 20)                        |          |

Abbreviations: CI, confidence interval; NR, not reached.

\* Within CN-AML patients, the ELN Favorable Genetic Group comprises patients with mutated *CEBPA*, and/or mutated *NPM1* without *FLT3-ITD*. All remaining CN-AML patients (ie, those with wild-type *CEBPA*, and *NPM1*-mutated with *FLT3-ITD* or with wild-type *NPM1* with or without *FLT3-ITD*) belong to the ELN Intermediate-I Genetic Group.

<sup>†</sup> The median expression value was used as a cut point. Gene expression was measured using NanoString.
